# Supplementary material for: Elevated SGK1 predicts resistance of breast cancer cells to Akt inhibitors
Source: PubMed Central journal article supplement (PMC3671793; doi:10.1042/bj20130342), 2013-05-31
Supplement: bj4520499add.pdf [file bj4520499add.pdf]

SUPPLEMENTARY ONLINE DATA

Elevated SGK1 predicts resistance of breast cancer cells to Akt inhibitors

Eeva M. SOMMER\*<sup>1</sup>, Hannah DRY†, Darren CROSS†, Sylvie GUICHARD†, Barry R. DAVIES† and Dario R. ALESSI\*<sup>1</sup>

\*MRC Protein Phosphorylation and Ubiquitylation Unit, College of Life Sciences, University of Dundee, Dundee DD1 5EH, U.K., and †Oncology iMED, AstraZeneca, Alderley Park, Cheshire SK10 4TG, U.K.

Pan PDK1-site phospho-site antibody characterisation

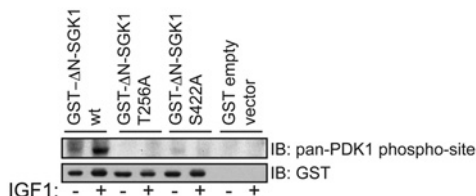

Figure S1 Characterization of pan-PDK1-site antibody (CST #9379) for monitoring SGK1 Thr<sup>256</sup> phosphorylation

HEK-293 cells were transiently transfected with either wild-type, T256A or S422A GST (glutathione transferase)-ΔN-SGK1. At 24 h post-transfection, cells were serum starved for 16 h, stimulated with 50 ng/ml IGF1 (insulin-like growth factor 1) for 30 min, lysed and subjected to immunoblot (IB) analysis with the indicated antibodies. Mutation of the hydrophobic motif Ser<sup>422</sup> to an alanine residue prevents PDK1 from phosphorylating the T-loop (Thr<sup>256</sup>) of SGK1, as mTORC2 phosphorylates the hydrophobic motif of SGK1 creating a docking site for PDK1 that subsequently phosphorylates Thr<sup>256</sup> [1].

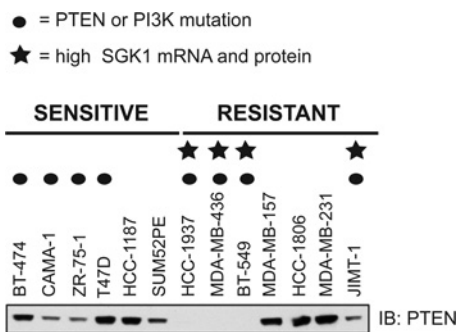

Figure S2 PTEN protein expression in the cell lines used

Total protein was isolated from the cells indicated and the lysates were analysed by immunoblotting (IB) with anti-PTEN antibody.

<sup>1</sup> Correspondence may be addressed to either of these authors (email e.sommer@dundee.ac.uk or d.r.alessi@dundee.ac.uk).

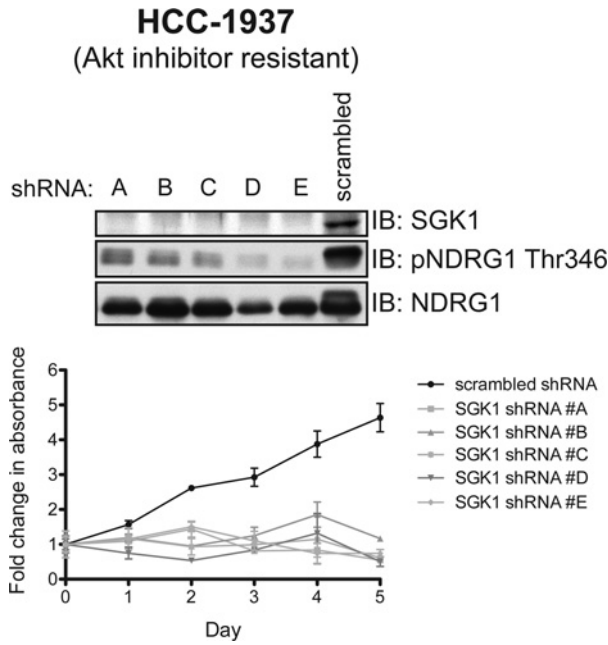

**Figure S3** SGK1 knockdown reduces NDRG1 phosphorylation and suppresses proliferation in HCC-1937 cells

HCC-1937 cells were transduced with lentiviral SGK1 and scrambled shRNAs. For experiments shown in the upper panel, cells were lysed 72 h post-infection and the lysates were analysed with the indicated antibodies by immunoblotting (IB). For the experiments shown in the lower panel, equal numbers of cells were seeded 48 h post-infection on to 96-well plates and allowed to adhere overnight. Cell proliferation was then determined over a 5 day period by carrying out the MTS assay at 24 h intervals. Each data point is the average MTS assay of samples assayed in triplicate  $\pm$  S.D. Data are presented as fold change relative to day 0 values (day 0 equals 24 h post-seeding). Similar results were observed in at least two independent experiments. p, phospho-

### AKT INHIBITOR SENSITIVE CELLS

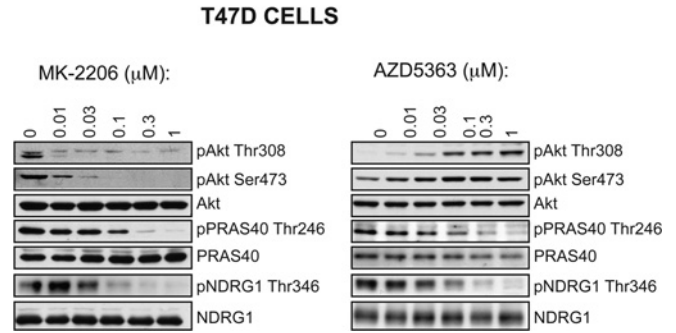

**Figure S4** Evidence that Akt mediates phosphorylation of NDRG1 in Akt-inhibitor-sensitive cells

T47D cells were treated with the indicated doses of the MK-2206 or AZD5363 Akt inhibitors for 1 h. Cells were lysed and analysed by immunoblotting with the indicated antibodies. Similar results were observed in two independent experiments.

### BT-549 CELLS

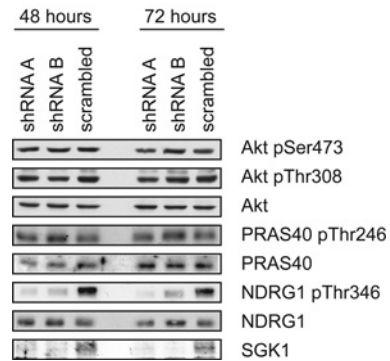

**Figure S5** Knockdown of SGK1 does not affect Akt signalling

BT-549 cells were transduced with lentiviral SGK1 and scrambled shRNAs. Cells were lysed at 48 and 72 h post-infection and the lysates were analysed with the indicated antibodies by immunoblotting.

**Table S1** Sequences and TRC numbers of the SGK1 shRNAs used in the present study

| shRNA     | TRC number     | Sequence (5'→3')                                            |
|-----------|----------------|-------------------------------------------------------------|
| A         | TRCN0000040175 | CCGGCGGAATGTTCTGTTGAAGAATCTCGAGATTCTCAACAGAACATCCGTTTTTG    |
| B         | TRCN0000040177 | CCGGCATGTCCTTCTCCTTAATTCTCGAGAATTAAGGAGAAGAAGACATGTTTTTG    |
| C         | TRCN0000010432 | CCGGCAATTCTCATCGCTTTCATGACTCGAGTCATGAAAGCGATGAGAATTGTTTTTG  |
| D         | TRCN0000196562 | CCGGGCAATCTTATTGCACACTGTTCTCGAGAACAGTGTGCAATAAGATTGCTTTTTTG |
| E         | TRCN0000194957 | CCGGCTGGAAGCTTAGCAATCTTATCTCGAGATAAGATTGCTAAGCTTCCAGTTTTTTG |
| Scrambled |                | CCTAAGGTTAAGTCGCCCTCGCTAGCGAGGGCGACTTAACCTTAGG              |

**Table S2 Sequences of primers used for qRT-PCR in the present study**

| Primer name          | Sequence (5' → 3')    |
|----------------------|-----------------------|
| Human SGK1 sense     | CATAGGAGTTATTGGCAAT   |
| Human SGK1 antisense | CTTCCATCTCACTAACCA    |
| Human SGK2 sense     | CTTTGTTATTAGGGATAGTCA |
| Human SGK2 antisense | GAAGTGAATGGTTTGCT     |
| Human SGK3 sense     | ATATTCTCTGGCAGGAA     |
| Human SGK3 antisense | AATGGCTCATTAAATCAGTT  |
| Human 18S sense      | CTAGAATTACCACAGTTATCC |
| Human 18S antisense  | CTAGAATTACCACAGTTATCC |

**Table S3 Summary of known mutations in the 13 breast cancer cell lines used in the present study**

The majority of the mutation information was obtained from the Cosmic database [2] available online at <http://cancer.sanger.ac.uk/cancergenome/projects/cosmic/>.

| Cell line  | Gene mutated or amplified | Mutation (amino acid)          | Reference  |
|------------|---------------------------|--------------------------------|------------|
| BT-474     | <i>PIK3CA</i>             | K111N                          | Cosmic [2] |
|            | <i>P53</i>                | E285K                          | Cosmic [2] |
| CAMA-1     | <i>CDH1</i>               | ?                              | Cosmic [2] |
|            | <i>PTEN</i>               | Thr <sup>277</sup> frameshift  | Cosmic [2] |
|            | <i>P53</i>                | D29H                           | Cosmic [2] |
| ZR-75-1    | <i>PTEN</i>               | R280T                          | Cosmic [2] |
|            | <i>P53</i>                | L108R                          | Cosmic [2] |
|            | <i>PI3KCA</i>             | H1047R                         | Cosmic [2] |
| T47D       | <i>P53</i>                | L194F                          | Cosmic [2] |
|            | <i>P53</i>                | Gly <sup>108</sup> deletion    | Cosmic [2] |
| HCC-1187   | <i>P53</i>                | Gly <sup>108</sup> deletion    | Cosmic [2] |
| SUM52PE    | <i>CDKN2A</i>             | A68V                           | Cosmic [2] |
|            | <i>FGFR2</i>              | Overexpression                 | [3]        |
| HCC-1937   | <i>BRCA1</i>              | Gln <sup>1756</sup> frameshift | Cosmic [2] |
|            | <i>P53</i>                | Arg <sup>306</sup> stop        | Cosmic [2] |
|            | <i>PTEN</i>               | Deletion of exons 1–9          | [4]        |
| MDA-MD-436 | <i>BRCA1</i>              | ?                              | Cosmic [2] |
|            | <i>RB1</i>                | Gly <sup>203</sup> frameshift  | Cosmic [2] |
| BT-549     | <i>PTEN</i>               | Val <sup>275</sup> frameshift  | Cosmic [2] |
|            | <i>RB1</i>                | ?                              | Cosmic [2] |
|            | <i>P53</i>                | R249S                          | Cosmic [2] |
| MDA-MB-157 | <i>NF1</i>                | Ser <sup>275</sup> frameshift  | Cosmic [2] |
|            | <i>P53</i>                | Ala <sup>88</sup> frameshift   | Cosmic [2] |
|            | <i>MSH6</i>               | R644S and P42S                 | Cosmic [2] |
| HCC-1806   | <i>LKB1</i>               | Deletion                       | Cosmic [2] |
|            | <i>P53</i>                | Thr <sup>256</sup> frameshift  | Cosmic [2] |
|            | <i>KDM6A</i>              | Deletion                       | Cosmic [2] |
| MDA-MB-231 | <i>CDKN2a(p14)</i>        | Deletion                       | Cosmic [2] |
|            | <i>CDKN2A</i>             | Deletion                       | Cosmic [2] |
|            | <i>BRAF</i>               | G464V                          | Cosmic [2] |
|            | <i>CDKN2A</i>             | Deletion                       | Cosmic [2] |
|            | <i>CDKN2a(p14)</i>        | Deletion                       | Cosmic [2] |
|            | <i>KRAS</i>               | G13D                           | Cosmic [2] |
|            | <i>NF2</i>                | Glu <sup>231</sup> stop        | Cosmic [2] |
| JIMT-1     | <i>P53</i>                | R280K                          | Cosmic [2] |
|            | <i>HER-2</i>              | Amplification                  | [5]        |
|            | <i>PIK3CA</i>             | C420R (T1258C)                 | [6]        |

## REFERENCES

- García-Martínez, J. M. and Alessi, D. R. (2008) mTOR complex 2 (mTORC2) controls hydrophobic motif phosphorylation and activation of serum- and glucocorticoid-induced protein kinase 1 (SGK1). *Biochem. J.* **416**, 375–385
- Forbes, S. A., Bindal, N., Bamford, S., Cole, C., Kok, C. Y., Beare, D., Jia, M., Shepherd, R., Leung, K., Menzies, A. et al. (2011) COSMIC: mining complete cancer genomes in the Catalogue of Somatic Mutations in Cancer. *Nucleic Acids Res.* **39**, D945–D950
- Tannheimer, S. L., Rehemtulla, A. and Ethier, S. P. (2000) Characterization of fibroblast growth factor receptor 2 overexpression in the human breast cancer cell line SUM-52PE. *Breast Cancer Res.* **2**, 311–320
- Hollestelle, A., Elstrodt, F., Nagel, J. H., Kallemeijn, W. W. and Schutte, M. (2007) Phosphatidylinositol-3-OH kinase or RAS pathway mutations in human breast cancer cell lines. *Mol. Cancer Res.* **5**, 195–201
- Tanner, M., Kapanen, A. I., Junttila, T., Raheem, O., Grenman, S., Elo, J., Elenius, K. and Isola, J. (2004) Characterization of a novel cell line established from a patient with herceptin-resistant breast cancer. *Mol. Cancer Ther.* **3**, 1585–1592
- Koninki, K., Barok, M., Tanner, M., Staff, S., Pitkanen, J., Hemmila, P., Ilvesaro, J. and Isola, J. (2010) Multiple molecular mechanisms underlying trastuzumab and lapatinib resistance in JIMT-1 breast cancer cells. *Cancer Lett.* **294**, 211–219

Received 4 March 2013/11 April 2013; accepted 15 April 2013

Published as BJ Immediate Publication 15 April 2013, doi:10.1042/BJ20130342
